# Supplementary material
Source: PubMed Central journal article supplement (PMC2851884)
Supplement: 0911965107_pnas.200911965SI.pdf [file 0911965107_pnas.200911965SI.pdf]

# Supporting Information

Sugimoto et al. 10.1073/pnas.0911965107

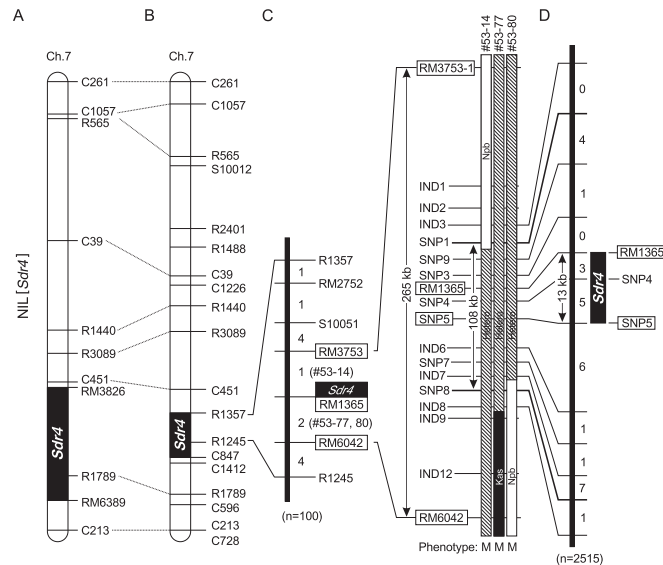

**Fig. S1.** Coarse- and high-resolution mapping of *Sdr4*. (A) Graphical genotype of chromosome 7 in NIL[*Sdr4*]. The introgressed segment from Kasalath is indicated by a black bar. The positions of RFLP markers and SSR markers are based on physical distance. (B) Chromosomal locations of *Sdr4*, based on genetic distance. (C) Coarse mapping of *Sdr4* using a population of  $n = 100$ . Numbers of recombinants between each set of markers are indicated. Phenotype "M" indicates mildly resistant to preharvest sprouting. By using this population, the *Sdr4* candidate region was delimited to 108 kbp. (D) High-resolution mapping using a population of  $n = 2,515$ . Numbers of recombinations between pairs of markers are shown. Black regions are chromosomal segments homozygous for the Kasalath allele; white regions are homozygous for the Nipponbare allele; hatched regions are heterozygous. Primer sequences of newly designed markers are listed in Table S2A.

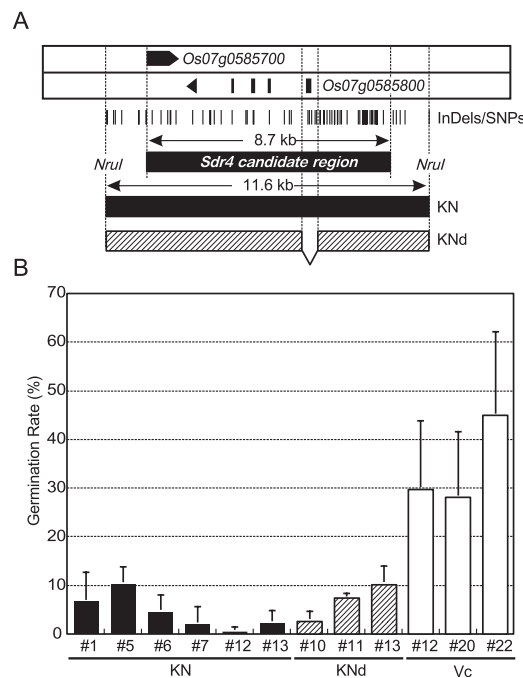

**Fig. S2.** Genetic complementation of *Sdr4* using the genomic fragment encompassing the entire candidate genomic region and its derivative. (A) Candidate genomic region of *Sdr4* and predicted genes. Genes to the right of the black arrow are those predicted by RAP-DB in the Nipponbare genomic sequence around the *Sdr4* candidate region. The 8.7-kb *Sdr4* candidate region was defined on the basis of high-resolution mapping. Vertical bars indicate InDels and SNPs located in the 11.6-kb region from *Nrul*. The 11.6-kb fragment (KN) and 11.2-kb fragment with a 0.4-kb deletion around the first exon of the *Os07g0585800* (KNd) were used for complementation analysis. (B) Germination rates of  $T_3$  seeds harboring the KN fragment, the KNd fragment, and empty vector (Vc). The presence of the KN fragment reduced germination rates, indicating that *Sdr4* was present in this fragment. The KNd fragment complemented the function of *Sdr4*, demonstrating that *Os07g0585800* was not the *Sdr4*.



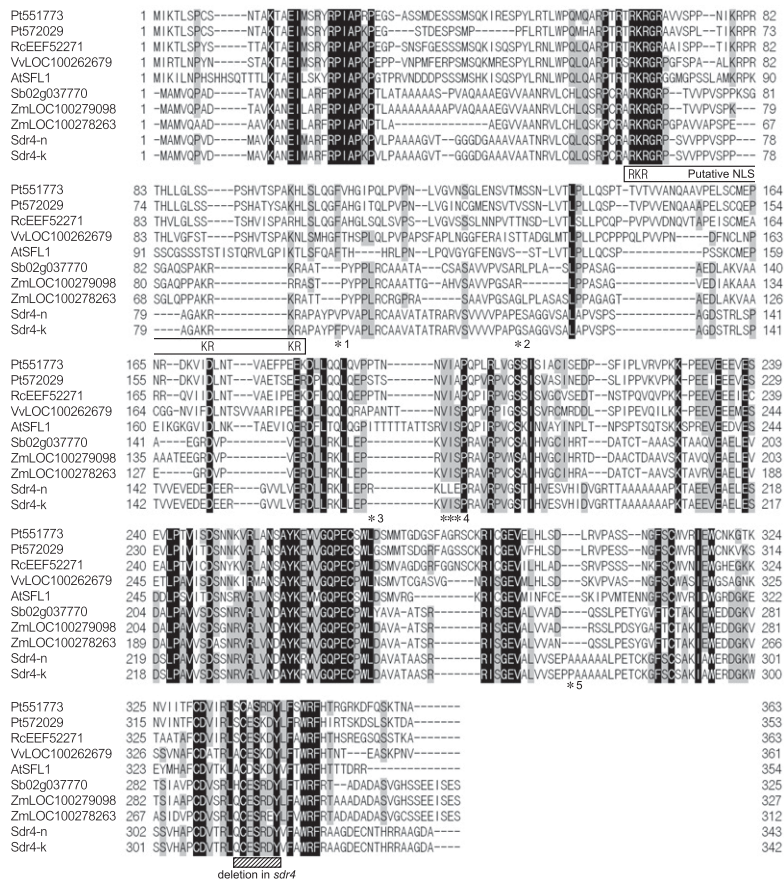

**Fig. 54.** Deduced amino acid sequence comparison between *Sdr4* and homologs. Amino acid sequences of predicted ORFs were compared between *Sdr4* and homologs. Amino acid substitutions between *Sdr4*-n and *Sdr4*-k are marked with asterisk followed by a number. Putative NLS and deletion in *sdr4* mutants are indicated by clear and hatched boxes, respectively.

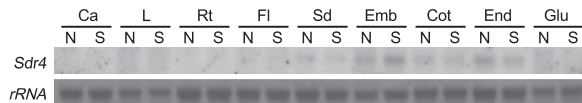

**Fig. 55.** Tissue specificity of *Sdr4* expression. *Sdr4* mRNA levels in various tissues of plants or seeds 14 days after heading of Nipponbare (N) or NIL[*Sdr4*] (S) were detected by RNA gel blot analysis. Ca, callus; L, leaf; Rt, root; Fl, flower; Sd, whole seed; Emb, embryo; Cot, seed coat; End, endosperm; Glu, outer glume.

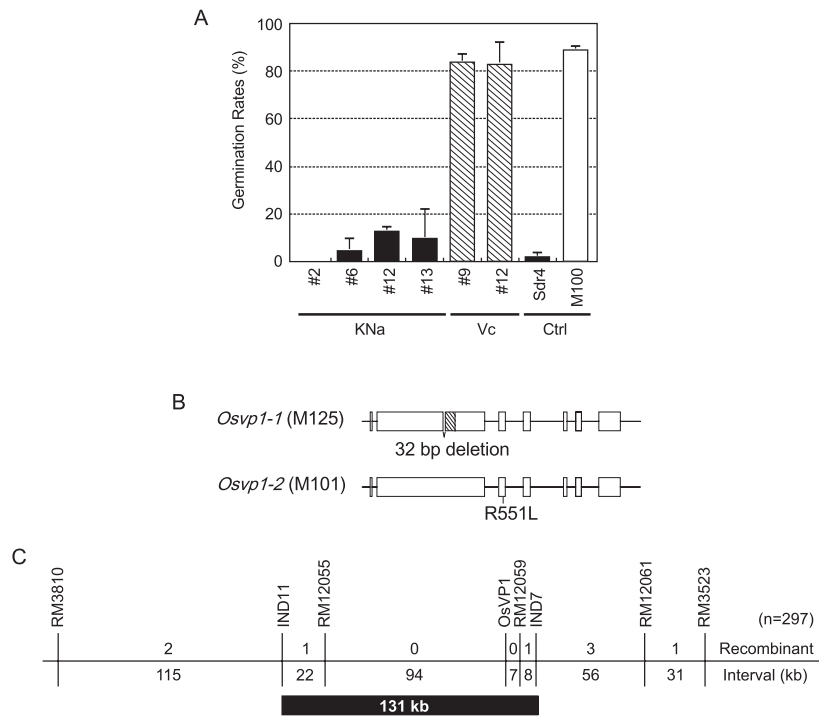

**Fig. S6.** Complementation of *sdr4* mutation, mutations in *OsVP1* mutants, and linkage analysis of M101 viviparous phenotype and *OsVP1-2* mutation. (A) Complementation of *sdr4* mutant (M100) was performed with a 3.3-kb *Sdr4-k* genomic fragment (Fig. 1 C and D). The germination rates of transgenic lines with *Sdr4-k* (KNa) were lower than those of the vector control lines (Vc), indicating that the viviparous phenotype of the M100 line was due to the mutation in *Sdr4*. Germination rates of NIL[*Sdr4*] (Sdr4) and the *sdr4* mutant (M100) are shown together. (B) Mutations in the *OsVP1* gene are summarized. (C) Tight linkage of *OsVP1-2* mutation and viviparous phenotype shown by genetic mapping using a mapping population derived from F<sub>2</sub> seeds selected by preharvest sprouting at 4 weeks after heading from M101 × Kasalath cross F<sub>1</sub> plants. This result shows that the *OsVP1-2* mutation and the causal mutation of the viviparous phenotype lay within the indicated 131-kb region. The sequences of the PCR primers for markers were 5'-CGT CAG TGC ACC GAA GTT T-3' and 5'-CTG GCT TTT GGA GAA GAT CG-3' for IND11, and 5'-GAT TAA GCA CGG CTC ACC AC-3' and 5'-GGT TAA CGG GTC TCC ACA CA-3' for IND7.

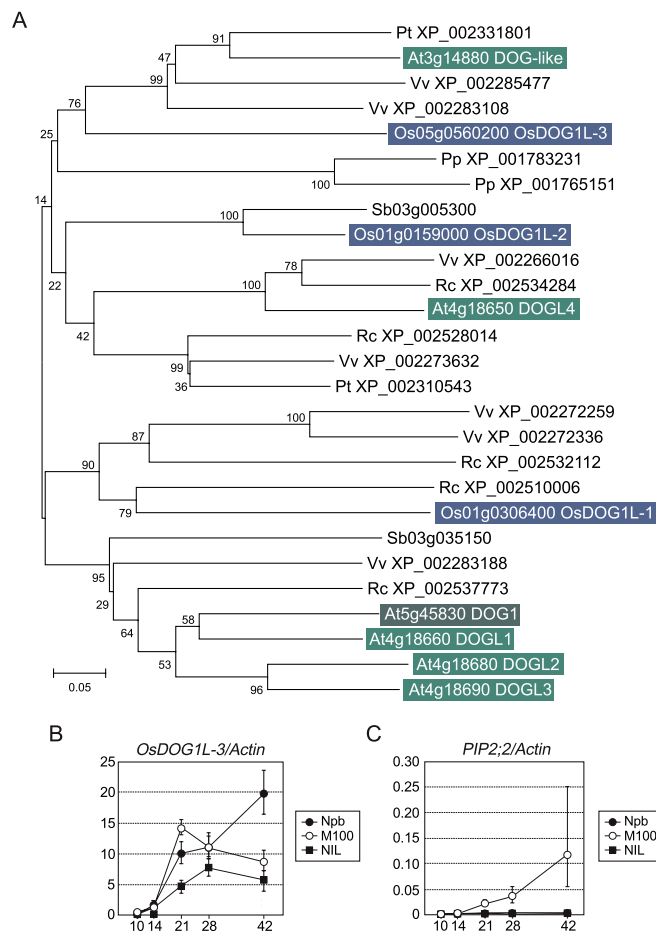

**Fig. S7.** Phylogenetic analysis of *DOG1* homologs and expression analysis of *DOG1* like-3 and *PIP2;2*. (A) *DOG1* homologs were searched using the BLASTP program of NCBI (<http://blast.ncbi.nlm.nih.gov/Blast.cgi>) against the reference protein sequence database. Those with  $E$  values  $<e^{-10}$  were selected for phylogenetic analysis. Sequences were aligned using Genetyx version 9 software (Genetyx). Evolutionary history was inferred using the neighbor-joining method (1). The optimum tree with a sum of branch lengths of 6.23632813 is shown. The percentages of replicate trees in which the 27 associated amino acid sequences clustered together in the bootstrap test (1,000 replicates) are shown next to the branches. The tree is drawn to scale, with branch lengths in the same units as those of the distances used to infer the phylogenetic tree. All positions containing gaps and missing data were eliminated from the dataset. The final dataset contained a total of 88 positions. Phylogenetic analyses were conducted using MEGA4 software (2). (B) Temporal changes (DAF) in mRNA levels in embryos of the *OsDOG1* like-3 gene was monitored by real-time PCR in Nipponbare (Npb), the *sdr4* mutant (M100), and NIL[*Sdr4*] (NIL), with three biological repeats. Expression levels are normalized to *Actin-1* expression. (C) Temporal changes (DAF) in mRNA levels in embryos of the aquaporin gene (*PIP2;2*) monitored by real-time PCR.

1. Saitou N, Nei M (1987) The neighbor-joining method: A new method for reconstructing phylogenetic trees. *Mol Biol Evol* 4:406–425.
2. Tamura K, Dudley J, Nei M, Kumar S (2007) MEGA4: Molecular Evolutionary Genetics Analysis (MEGA) software version 4.0. *Mol Biol Evol* 24:1596–1599.

|       | SNP name           | SNP1 | SNP2 | Sdr4 | SNP3 | SNP4 | SNP5 |           |
|-------|--------------------|------|------|------|------|------|------|-----------|
|       | Distance (Mb)      | -1.6 | -0.1 | 0    | +0.1 | +0.3 | +1.2 |           |
| Code  | Chr. position (Mb) | 22.9 | 24.4 | 24.5 | 24.6 | 24.8 | 25.7 | Sub Group |
|       | Nipponbare         | C    | T    | n    | T    | A    | T    |           |
|       | Kasalath           | T    | C    | k    | G    | T    | C    |           |
| WRC01 | Nipponbare         | C    | T    | n    | T    | A    | T    | Jp        |
| WRC43 | Dianyu 1           | C    | T    | n    | T    | A    | T    | Jp        |
| WRC47 | Jaguary            | C    | T    | n    | T    | A    | T    | Jp        |
| WRC53 | Tima               | C    | T    | n    | T    | A    | T    | Jp        |
| WRC51 | Urasan 1           | C    | T    | n    | T    | A    | T    | Jp        |
| WRC46 | Khao Nok           | T    | T    | n    | T    | A    | T    | Jp        |
| WRC48 | Khau Mac Kho       | T    | T    | n    | T    | A    | T    | Jp        |
| WRC49 | Padi Perak         | T    | T    | n    | T    | A    | T    | Jp        |
| WRC68 | Khao Nam Jen       | T    | T    | n    | T    | A    | T    | Jp        |
| WRC52 | Khau Tan Chiem     | T    | T    | n    | T    | A    | T    | Jp        |
| WRC45 | Ma sho             | T    | T    | n    | T    | A    | T    | Jp        |
| WRC67 | Phulba             | T    | T    | n    | T    | A    | T    | Jp        |
| WRC50 | Rexmont            | T    | T    | n    | T    | A    | T    | Jp        |
| WRC13 | Asu                | T    | T    | n    | T    | A    | C    | In-2      |
| WRC42 | Local Basmati      | T    | T    | n    | T    | A    | C    | In-1      |
| WRC29 | Kalo Dhan          | T    | T    | n    | T    | A    | C    | In-1      |
| WRC28 | Jarjan             | T    | T    | n    | T    | A    | C    | In-1      |
| WRC21 | Shwe Nang Gyi      | T    | T    | n    | T    | A    | C    | In-2      |
| WRC66 | Bingala            | T    | T    | n    | T    | A    | C    | In-2      |
| WRC27 | Nepal 8            | T    | T    | n    | T    | A    | C    | In-1      |
| WRC04 | Jena 035           | T    | T    | n    | T    | A    | C    | In-1      |
| WRC26 | Jhona 2            | T    | T    | n    | T    | A    | C    | In-1      |
| WRC34 | ARC 7291           | T    | T    | n    | T    | A    | C    | In-1      |
| WRC25 | Muha               | T    | T    | n    | T    | A    | C    | In-1      |
| WRC44 | Basilanon          | T    | T    | n    | T    | T    | C    | In-1      |
| WRC09 | Ryousuisannkoumai  | T    | T    | n    | T    | T    | C    | In-2      |
| WRC55 | Tupa729            | T    | T    | n    | G    | A    | C    | Jp        |
| WRC03 | Bei Khe            | T    | T    | n    | G    | A    | C    | In-2      |
| WRC07 | Davao 1            | T    | C    | n    | T    | A    | C    | In-2      |
| WRC38 | ARC 11094          | T    | C    | n    | T    | A    | C    | In-1      |
| WRC62 | Kemasin            | C    | C    | n    | G    | A    | C    | In-2      |
| WRC64 | Padi Kuning        | C    | C    | n    | G    | T    | C    | In-2      |
| WRC06 | Pulauk Arang       | C    | C    | n    | G    | T    | C    | In-2      |
| WRC39 | Badari Dhan        | T    | T    | n    | G    | T    | C    | In-1      |
| WRC36 | Ratul              | T    | T    | n    | G    | T    | C    | In-1      |
| WRC11 | Kinkagin           | T    | C    | n    | G    | T    | C    | In-2      |
| WRC18 | Seiyu              | T    | C    | n    | G    | T    | C    | In-2      |
| WRC19 | Touchusai          | T    | C    | n    | G    | T    | C    | In-2      |
| WRC20 | Tadukan            | T    | C    | n    | G    | T    | C    | In-2      |
| WRC57 | Mitusyou 23        | T    | C    | k    | G    | T    | C    | In-2      |
| WRC05 | Naba               | T    | C    | k    | G    | T    | C    | In-2      |
| WRC10 | QuiZhaoZong        | T    | C    | k    | G    | T    | C    | In-2      |
| WRC37 | ARC 7047           | T    | C    | k    | T    | T    | C    | In-1      |
| WRC40 | Nepal 555          | T    | C    | k    | G    | T    | C    | In-1      |
| WRC33 | Surjamukhi         | T    | T    | k    | G    | T    | C    | In-1      |
| WRC35 | ARC 5955           | T    | C    | k    | G    | T    | C    | In-1      |
| WRC30 | Anjana Dhan        | T    | C    | k    | G    | T    | C    | In-1      |
| WRC31 | Shoni              | T    | C    | k    | G    | T    | C    | In-1      |
| WRC02 | Kasalath           | T    | C    | k    | G    | T    | C    | In-1      |
| WRC32 | Tupa 121-3         | T    | C    | k    | G    | T    | C    | In-1      |
| WRC58 | Neang Menh         | T    | C    | k    | G    | T    | C    | In-2      |
| WRC59 | Neang Phtong       | T    | C    | k    | G    | T    | C    | In-2      |
| WRC60 | Hakphaynhay        | T    | C    | k    | G    | T    | C    | In-2      |
| WRC61 | Radin Goi Sesat    | T    | C    | k    | G    | T    | C    | In-2      |
| WRC63 | Bleiyo             | T    | C    | k    | G    | T    | C    | In-2      |
| WRC65 | Rambhog            | T    | C    | k    | G    | A    | C    | In-2      |

**Fig. S8.** SNPs in the peripheral region of *Sdr4*. Typing of world rice core collection around the *Sdr4* locus was performed as follows. Chromosomal regions located  $-1.6$ ,  $-0.3$ ,  $+0.4$ ,  $+1.0$ , and  $+1.2$  Mb from *Sdr4* in the world rice core collection (positions given in Table S2C) were amplified by PCR. They included introns and intergenic regions. PCR fragments were treated with ExoSap nuclease (GE Healthcare UK) and used as templates for sequencing reactions. Primers for this experiment are listed in Table S2C. SNPs were then summarized. Chromosomal positions of SNPs are based on the RAP-DB Build4 sequence. The *Sdr4* alleles *Sdr4-k* and *Sdr4-n* are represented by k and n, respectively. The *Indica*(In-1 or In-2)/*Japonica* subgroups of each cultivar are shown as In-1, In-2, or Jp (*japonica*).

## Other Supporting Information Files

**Table S1.** SNPs and InDels in the *Sdr4* gene in *O. sativa* cultivars and 46 accessions of *O. rufipogon*

[Table S1 \(DOC\)](#)

Amino acid substitutions relative to *Sdr4-n* are shown in the first line. Positions from the first ATG of each substitution are shown in the next line. SNPs and InDels of *Sdr4-n*, *Sdr4-k*, and *Sdr4-k'* are been added as Nipponbare, Kasalath, and Co13, respectively. Sequences of large insertions and deletions are given in the bottom line.

**Table S2.** Primer sequences of newly designed DNA markers used in the linkage mapping (A), primer sequences used to monitor mRNA levels by semi-quantitative RT-PCR or real-time PCR (B), and primer sequences used for SNP typing by sequencing (C)

[Table S2 \(DOCX\)](#)

In A, for InDel markers, amplified fragment sizes of Nipponbare and Kasalath are shown. For CAPS markers, target SNPs, restriction enzymes used to detect polymorphisms, and amplified sizes of larger fragments are shown. For SNP markers, primers for preamplification, acylCo primers, target SNPs, and amplified fragment sizes are shown. RAP-ID, RAP-DB accession number.
